# Supplementary material for: Synthesis, Molecular Docking Analysis, and Carbonic Anhydrase Inhibitory Evaluations of Benzenesulfonamide Derivatives Containing Thiazolidinone
Source: MDPI journal article supplement (doi:10.3390/molecules24132418), 2019-06-30
Supplement: s1 [file s1]

# Supporting Information: Synthesis, molecular docking analysis, and carbonic anhydrase IX inhibitory evaluations of benzenesulfonamide derivatives containing thiazolidinone

Zuo-Peng Zhang, Ze-Fa Yin, Jia-Yue Li, Zhi-Peng Wang, Qian-Jie Wu, Jian Wang, Yang Liu\*, Mao-Sheng Cheng\*

Key Laboratory of Structure-Based Drug Design & Discovery of Ministry of Education, School of Pharmaceutical Engineering, Shenyang Pharmaceutical University, Shenyang 110016, PR China.

\* Corresponding authors. Email: y.liu@syphu.edu.cn (Y. Liu); mscheng@syphu.edu.cn (M. Cheng)

**Table S1. Crystal data and structure refinement for compound 13.**

|                                             |                                                                              |
|---------------------------------------------|------------------------------------------------------------------------------|
| Identification code                         | ZZP1112                                                                      |
| Empirical formula                           | C <sub>26</sub> H <sub>25</sub> N <sub>3</sub> O <sub>3</sub> S <sub>2</sub> |
| Formula weight                              | 491.61                                                                       |
| Temperature/K                               | 100.00(10)                                                                   |
| Crystal system                              | triclinic                                                                    |
| Space group                                 | P-1                                                                          |
| a/Å                                         | 11.3246(7)                                                                   |
| b/Å                                         | 11.3412(8)                                                                   |
| c/Å                                         | 12.4507(8)                                                                   |
| α/°                                         | 66.290(7)                                                                    |
| β/°                                         | 89.665(5)                                                                    |
| γ/°                                         | 67.305(6)                                                                    |
| Volume/Å <sup>3</sup>                       | 1329.49(17)                                                                  |
| Z                                           | 2                                                                            |
| ρ <sub>calc</sub> /cm <sup>3</sup>          | 1.228                                                                        |
| μ/mm <sup>-1</sup>                          | 0.231                                                                        |
| F(000)                                      | 516.0                                                                        |
| Crystal size/mm <sup>3</sup>                | 0.13 × 0.12 × 0.11                                                           |
| Radiation                                   | MoKα (λ = 0.71073)                                                           |
| 2θ range for data collection/°              | 3.96 to 58.972                                                               |
| Index ranges                                | -15 ≤ h ≤ 14, -14 ≤ k ≤ 15, -16 ≤ l ≤ 16                                     |
| Reflections collected                       | 17723                                                                        |
| Independent reflections                     | 6410 [R <sub>int</sub> = 0.0362, R <sub>sigma</sub> = 0.0469]                |
| Data/restraints/parameters                  | 6410/9/316                                                                   |
| Goodness-of-fit on F <sup>2</sup>           | 1.077                                                                        |
| Final R indexes [I ≥ 2σ (I)]                | R <sub>1</sub> = 0.0645, wR <sub>2</sub> = 0.1657                            |
| Final R indexes [all data]                  | R <sub>1</sub> = 0.0773, wR <sub>2</sub> = 0.1765                            |
| Largest diff. peak/hole / e Å <sup>-3</sup> | 0.72/-0.68                                                                   |

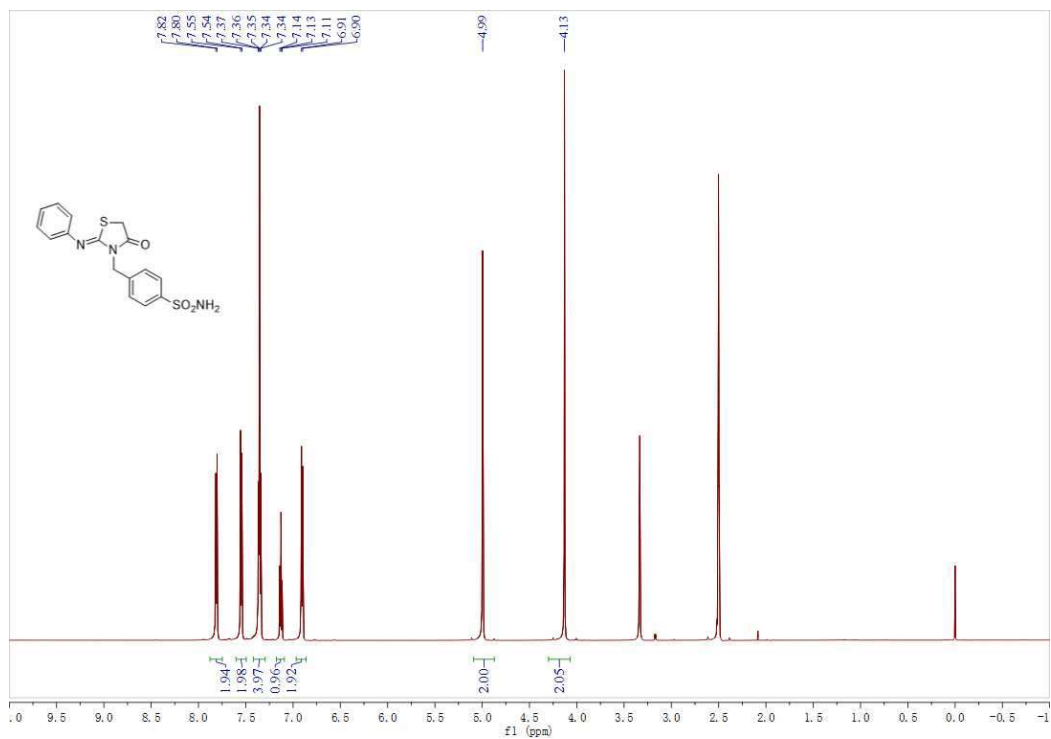

Figure S1. The <sup>1</sup>H-NMR of compound 2

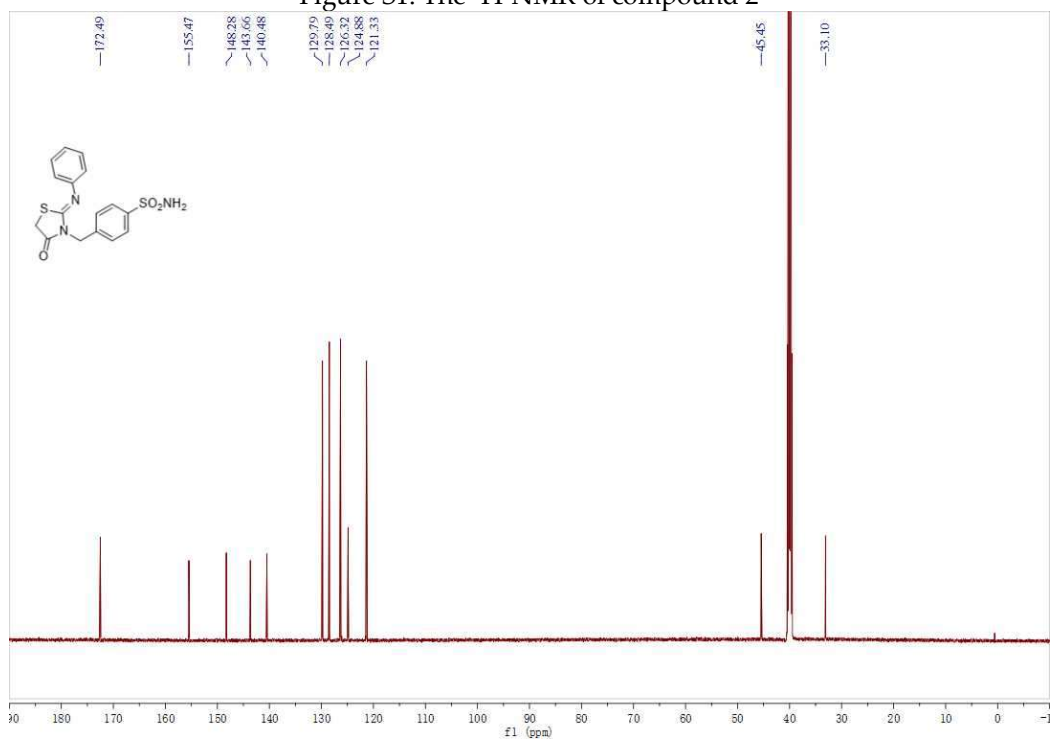

Figure S2. The <sup>13</sup>C-NMR of compound 2

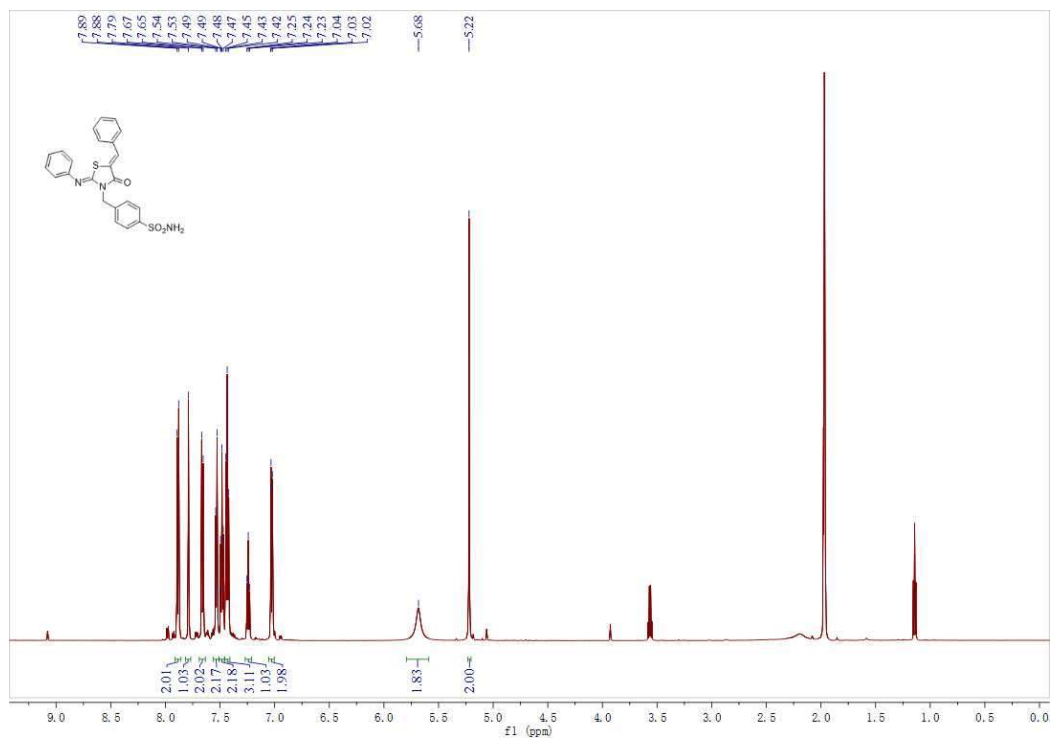

Figure S3. The <sup>1</sup>H-NMR of compound 3

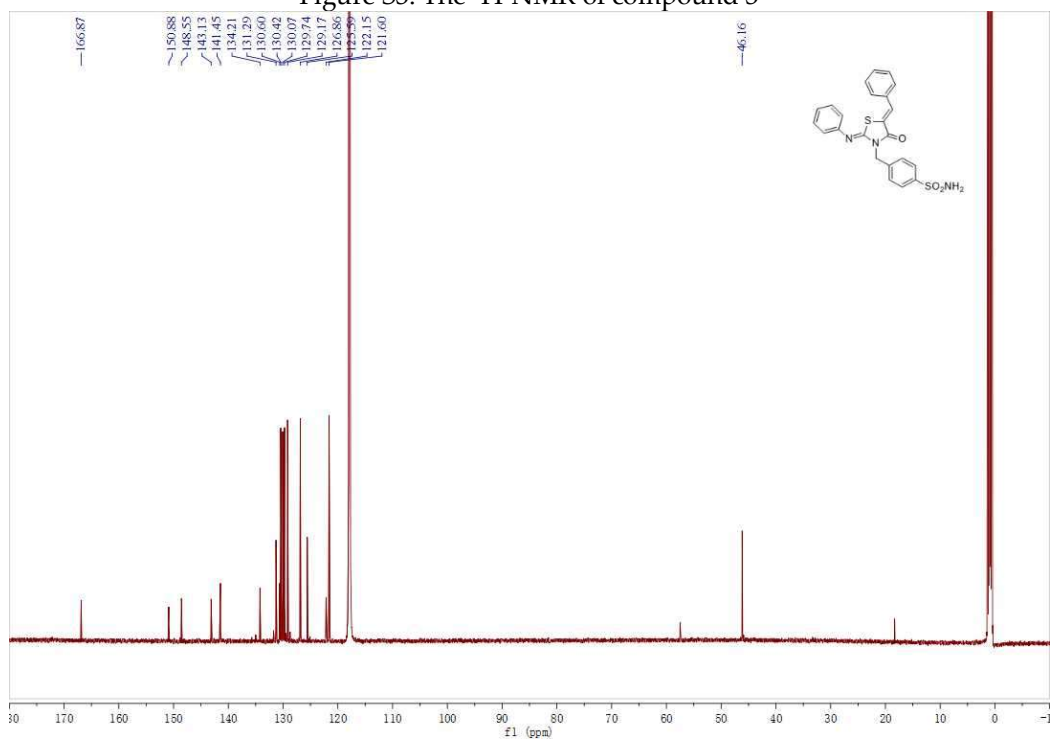

Figure S4. The <sup>13</sup>C-NMR of compound 3

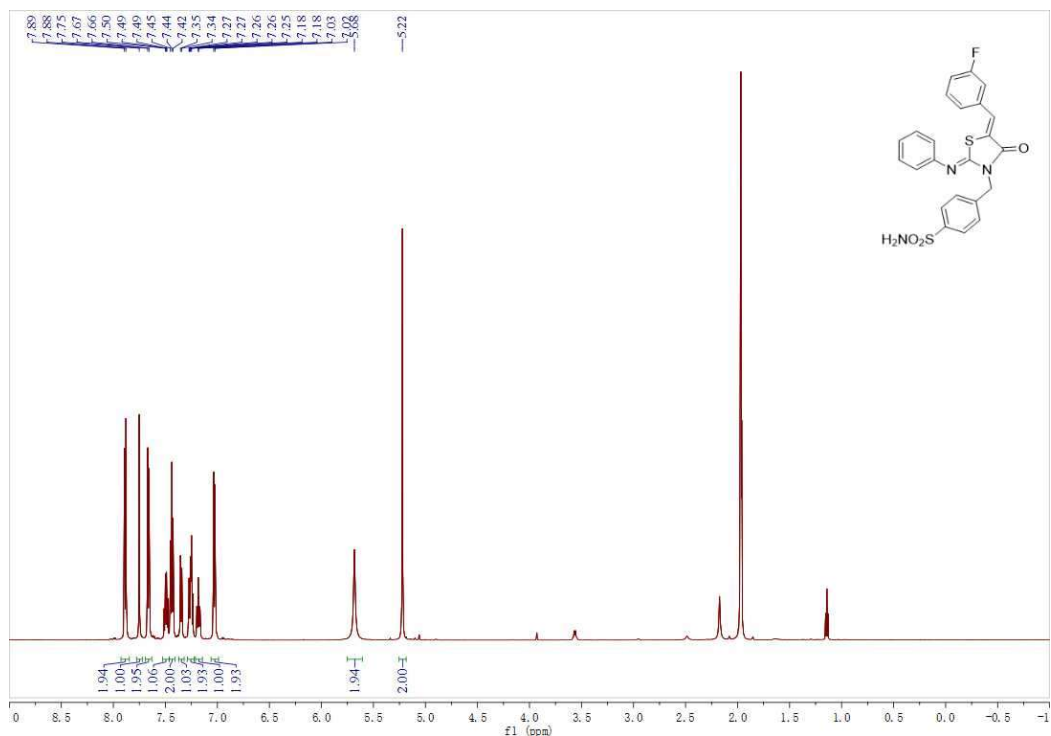

Figure S5. The <sup>1</sup>H-NMR of compound 4

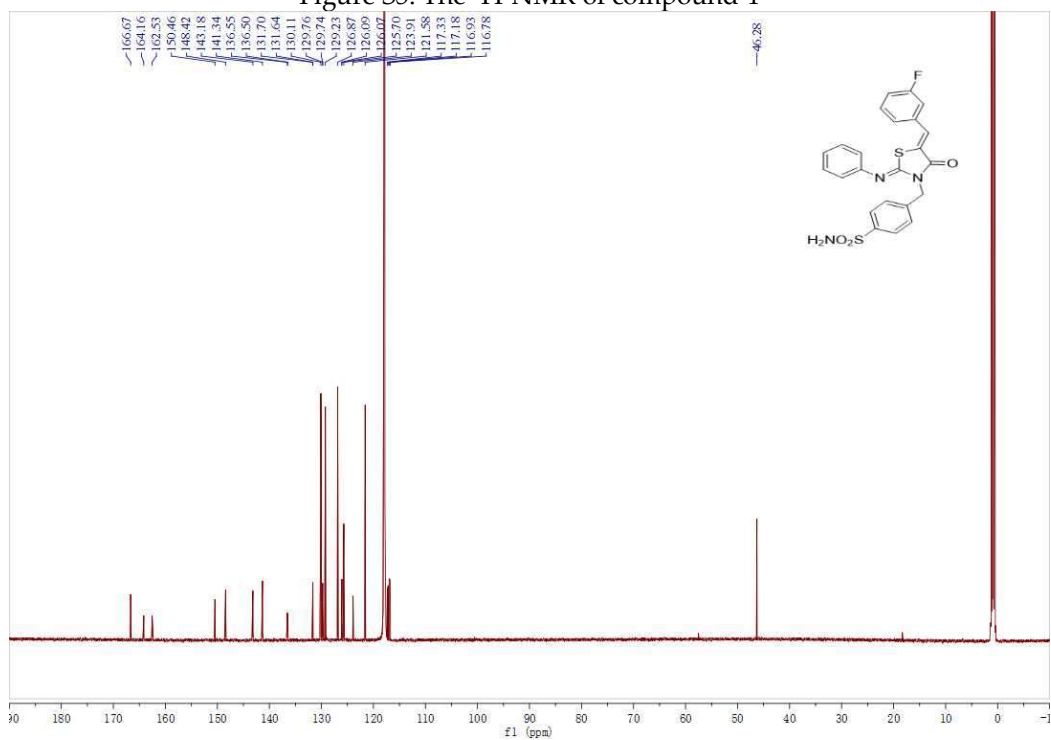

Figure S6. The <sup>13</sup>C-NMR of compound 4

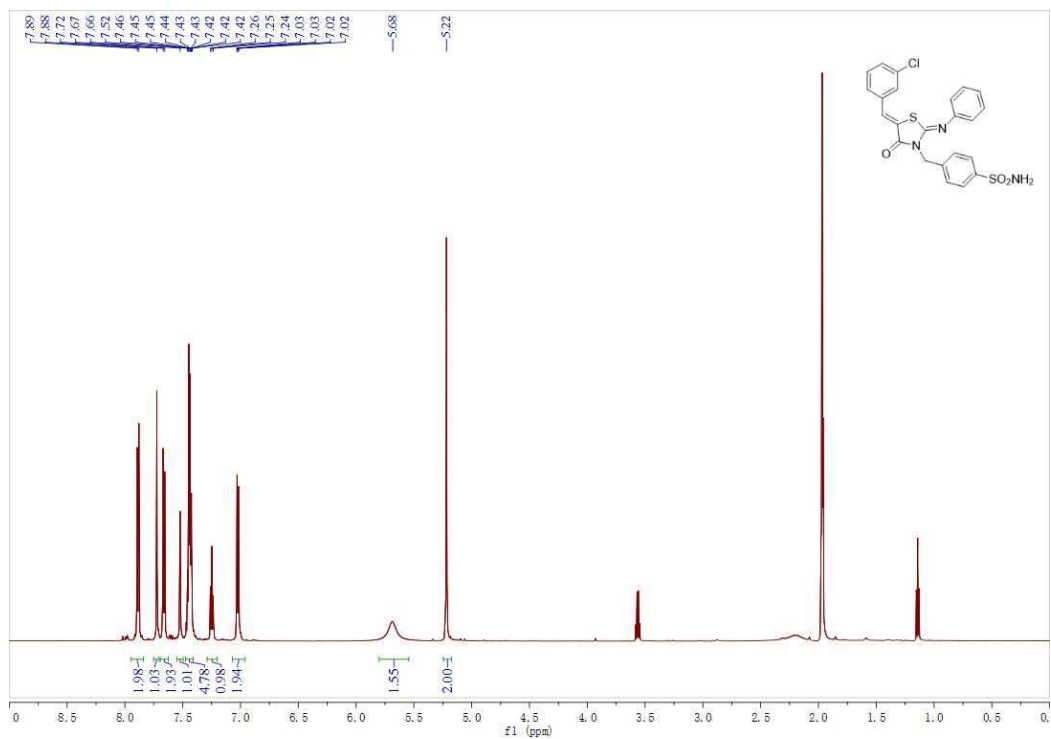

Figure S7. The <sup>1</sup>H-NMR of compound 5

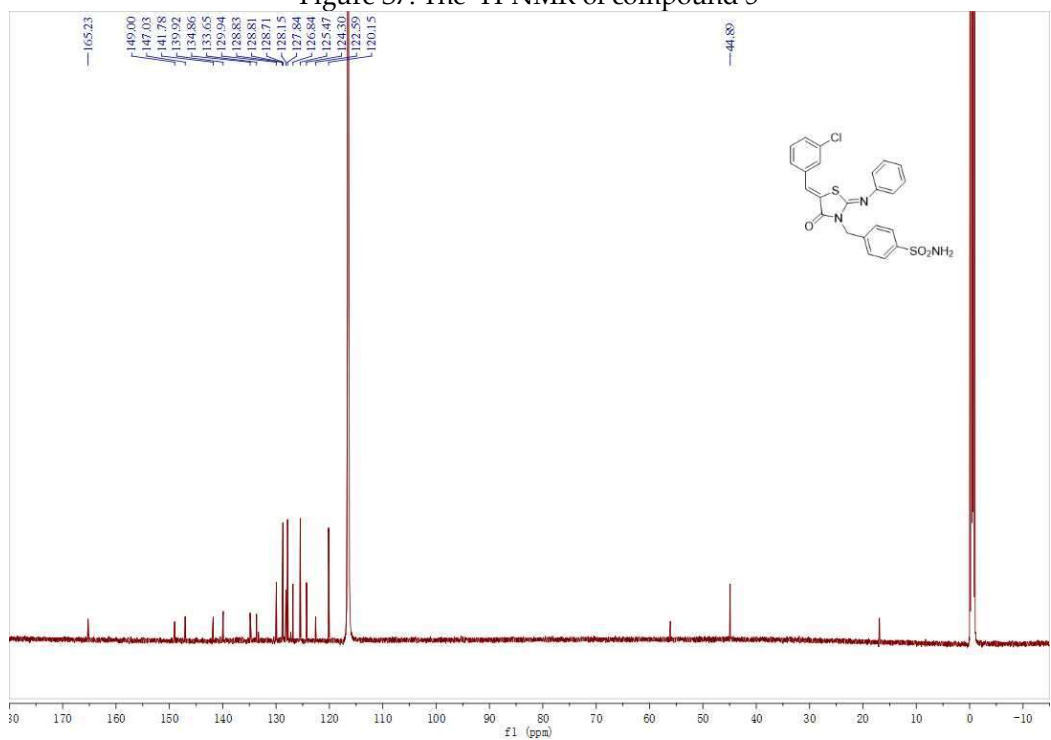

Figure S8. The <sup>13</sup>C-NMR of compound 5

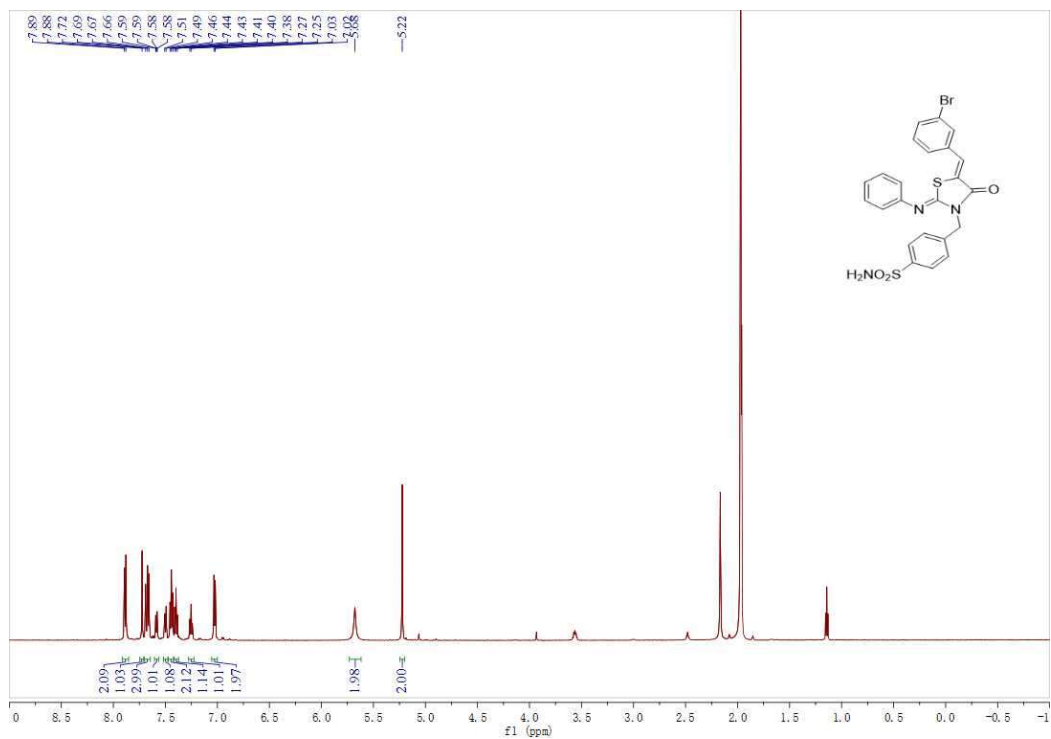

Figure S9. The <sup>1</sup>H-NMR of compound 6

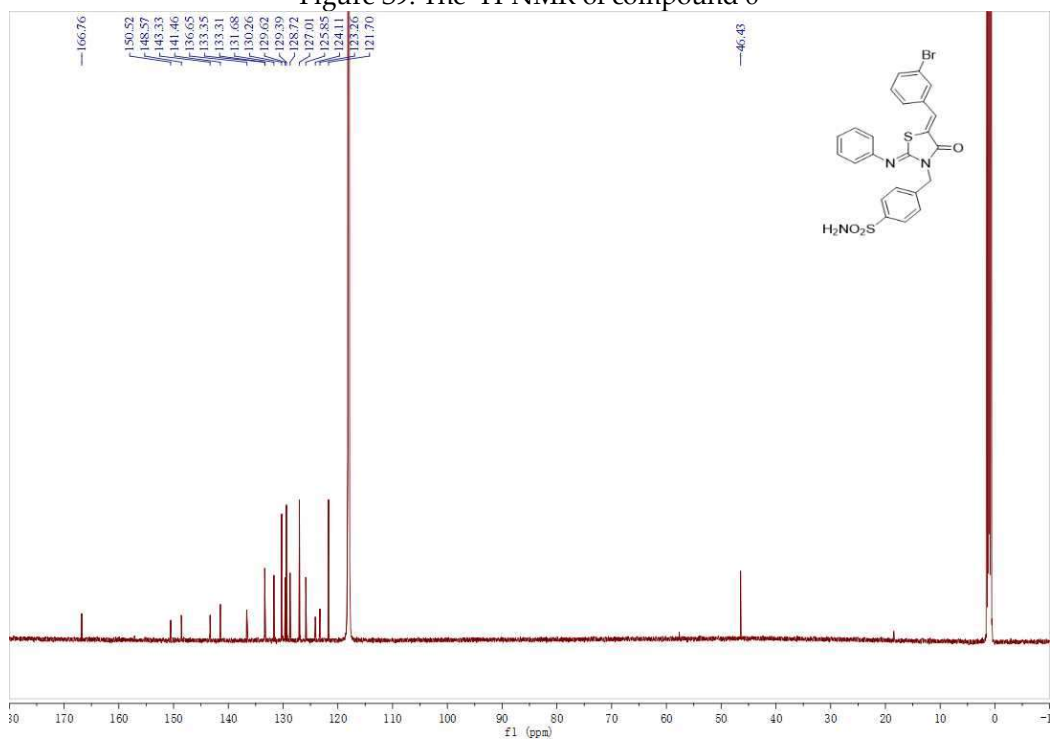

Figure S10. The <sup>13</sup>C-NMR of compound 6

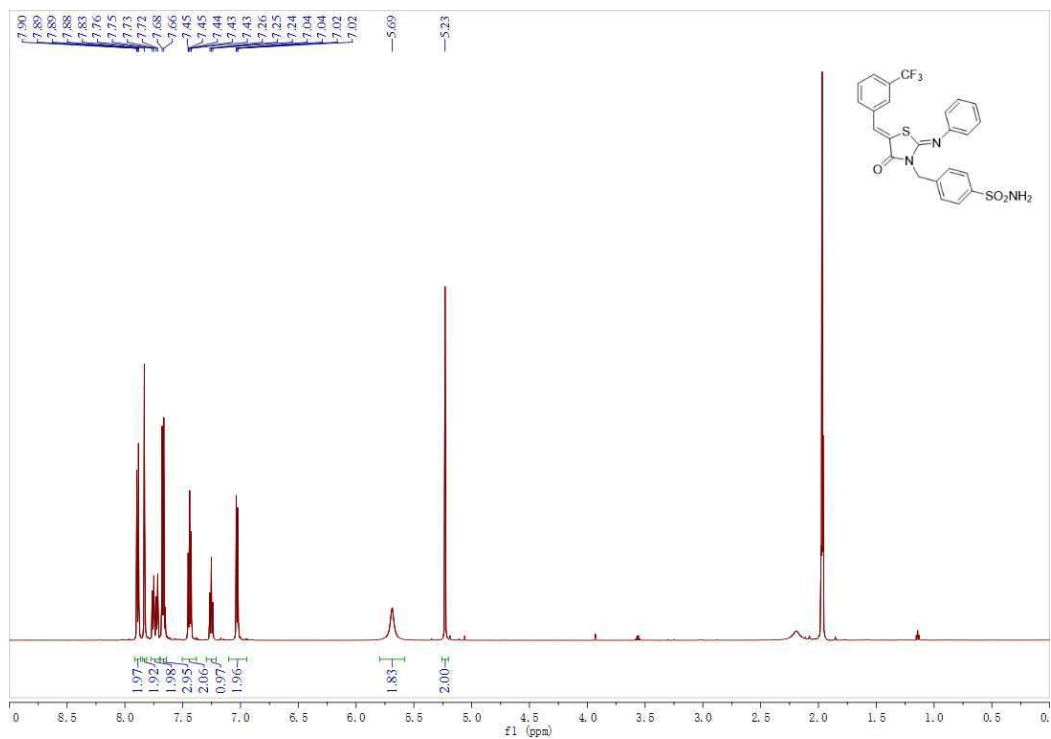

Figure S11. The  $^1\text{H}$ -NMR of compound 7

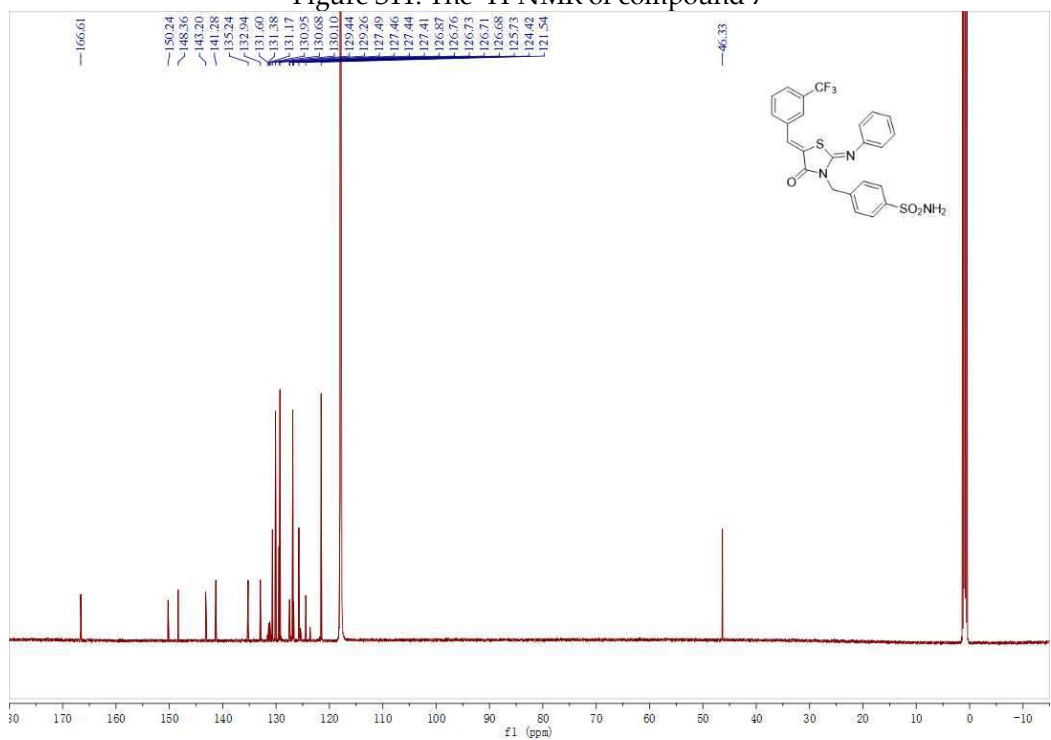

Figure S12. The  $^{13}\text{C}$ -NMR of compound 7

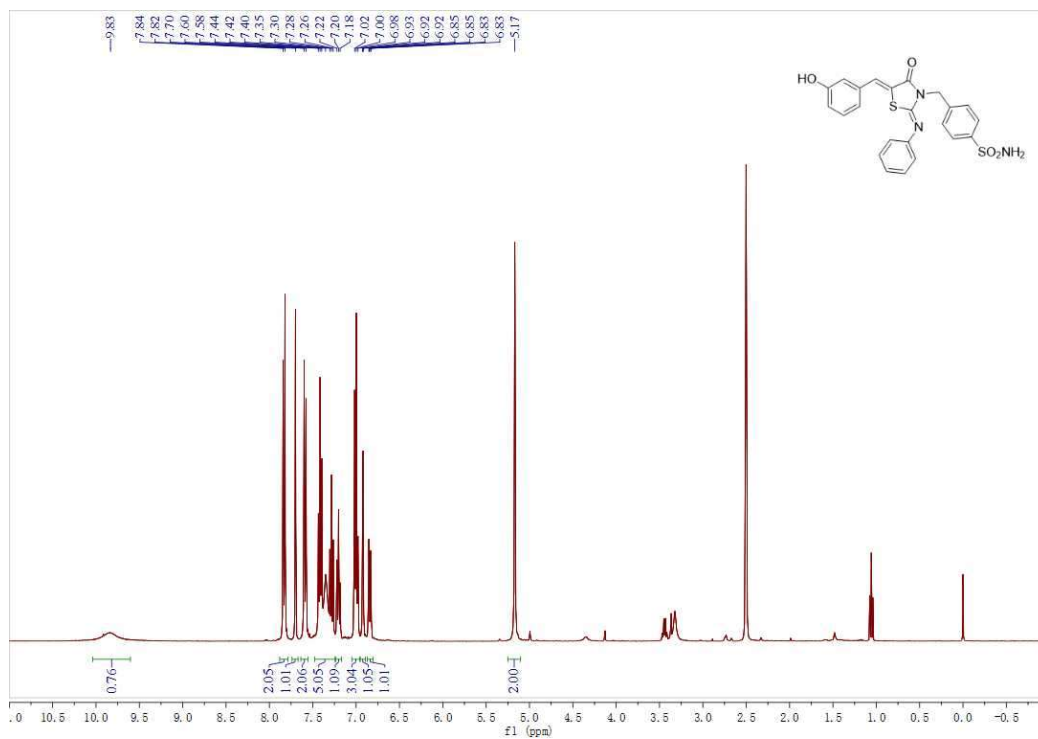

Figure S13. The <sup>1</sup>H-NMR of compound 8

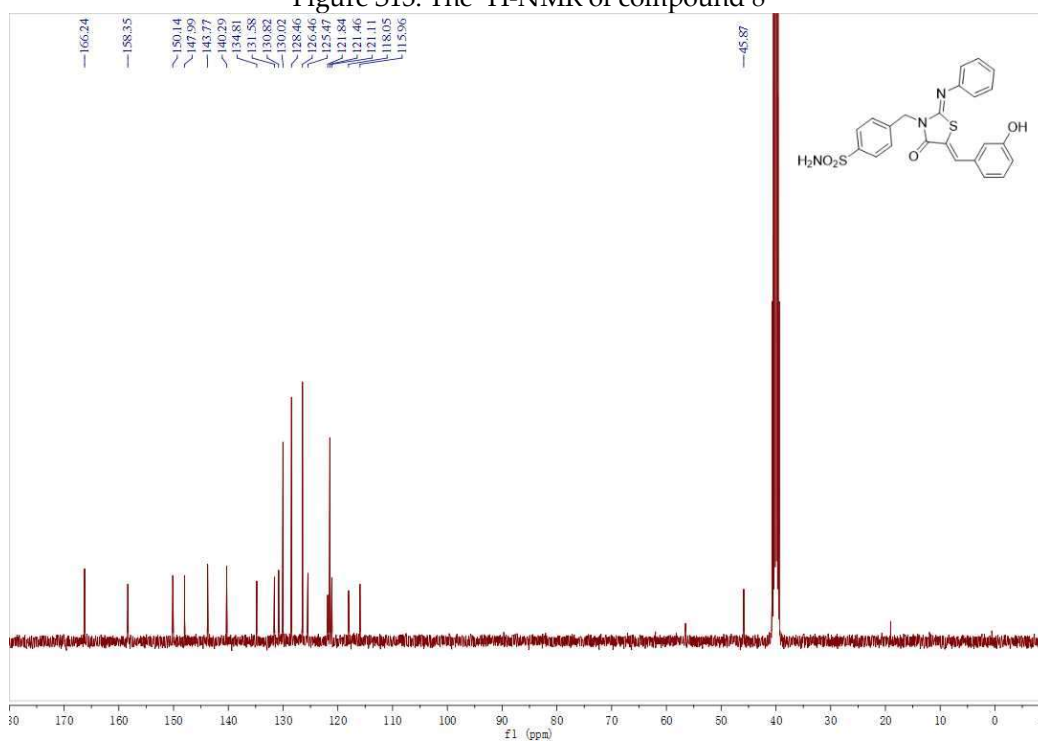

Figure S14. The <sup>13</sup>C-NMR of compound 8



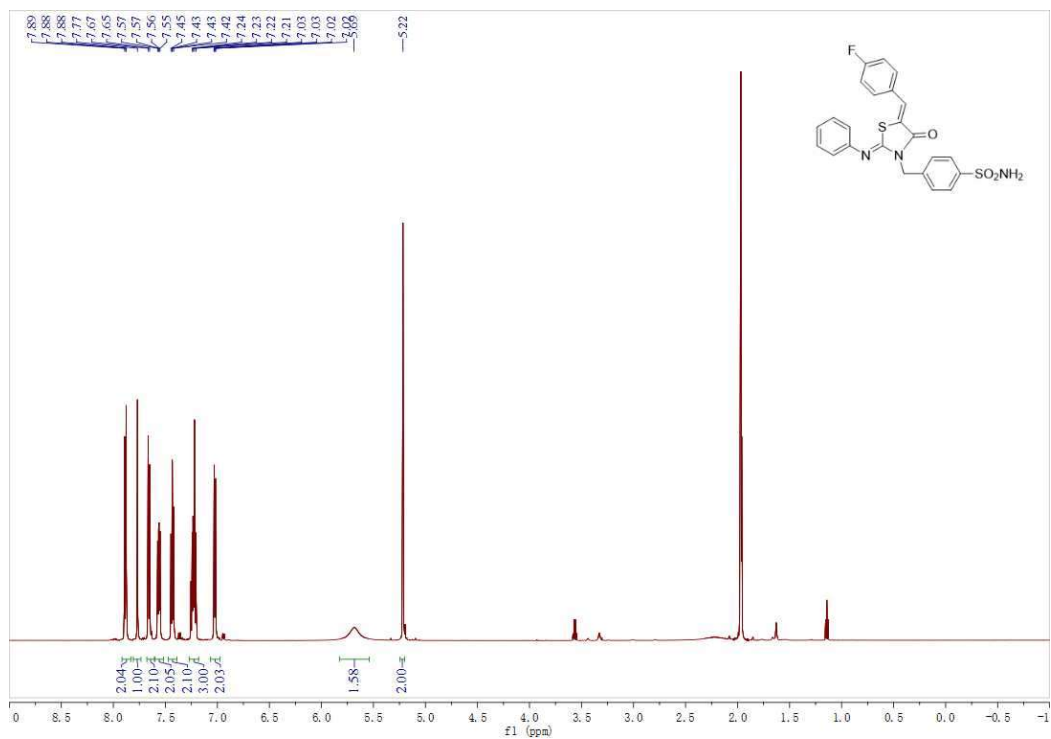

Figure S15. The <sup>1</sup>H-NMR of compound 9

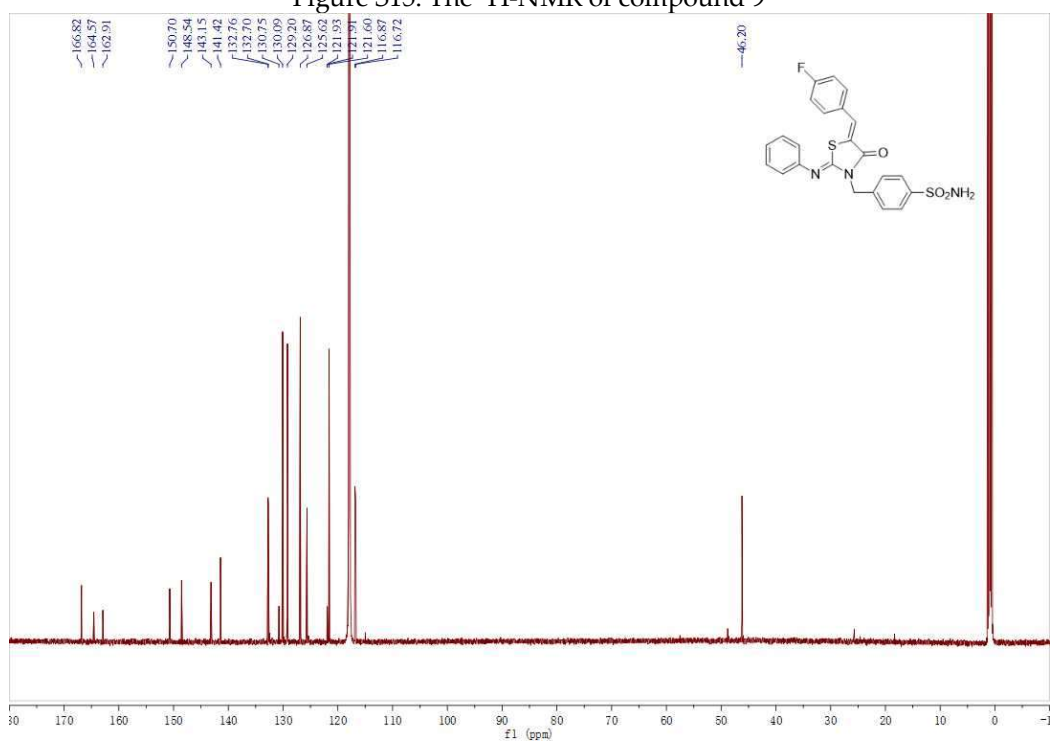

Figure S16. The <sup>13</sup>C-NMR of compound 9

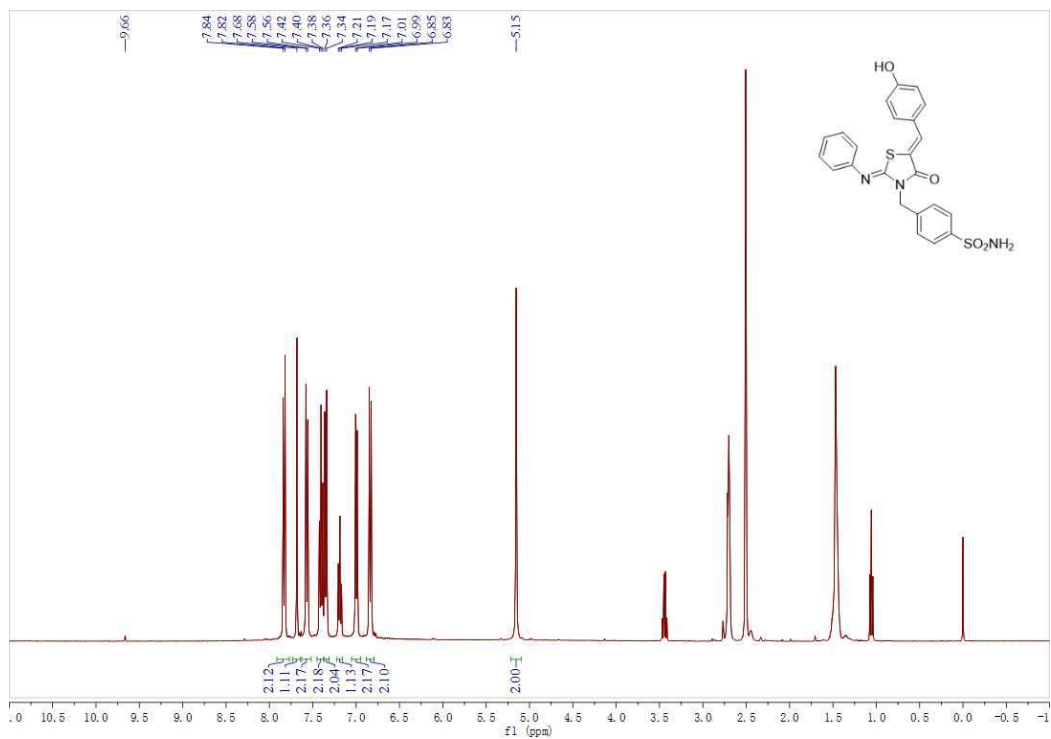

Figure S17. The <sup>1</sup>H-NMR of compound 10

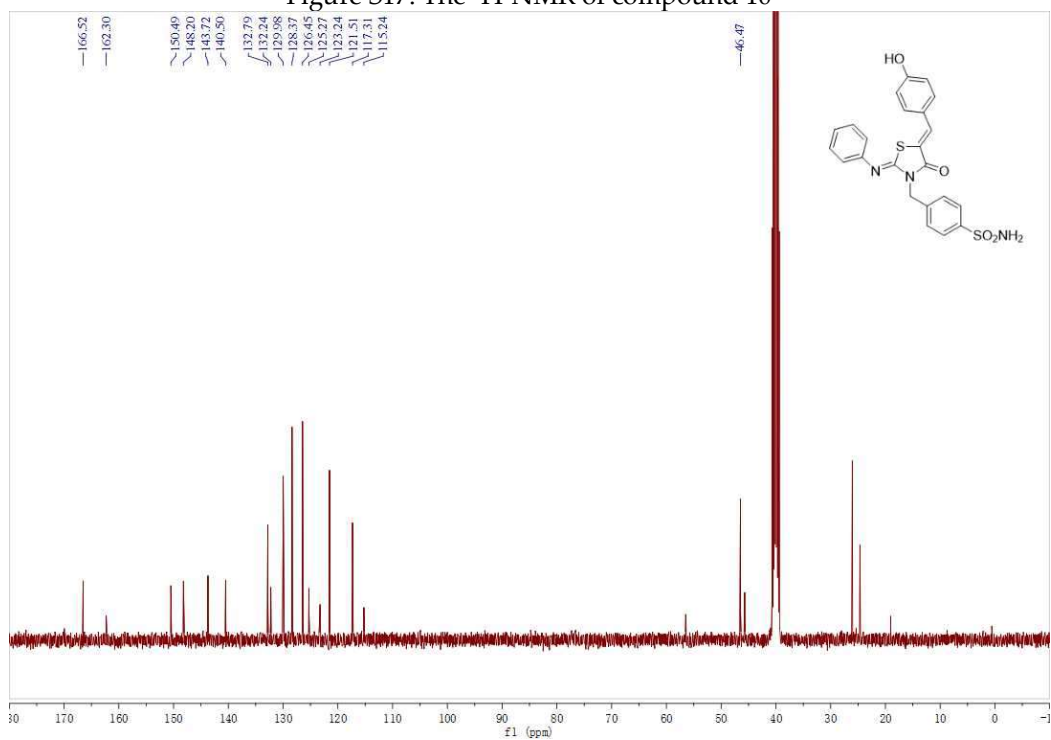

Figure S18. The <sup>13</sup>C-NMR of compound 10

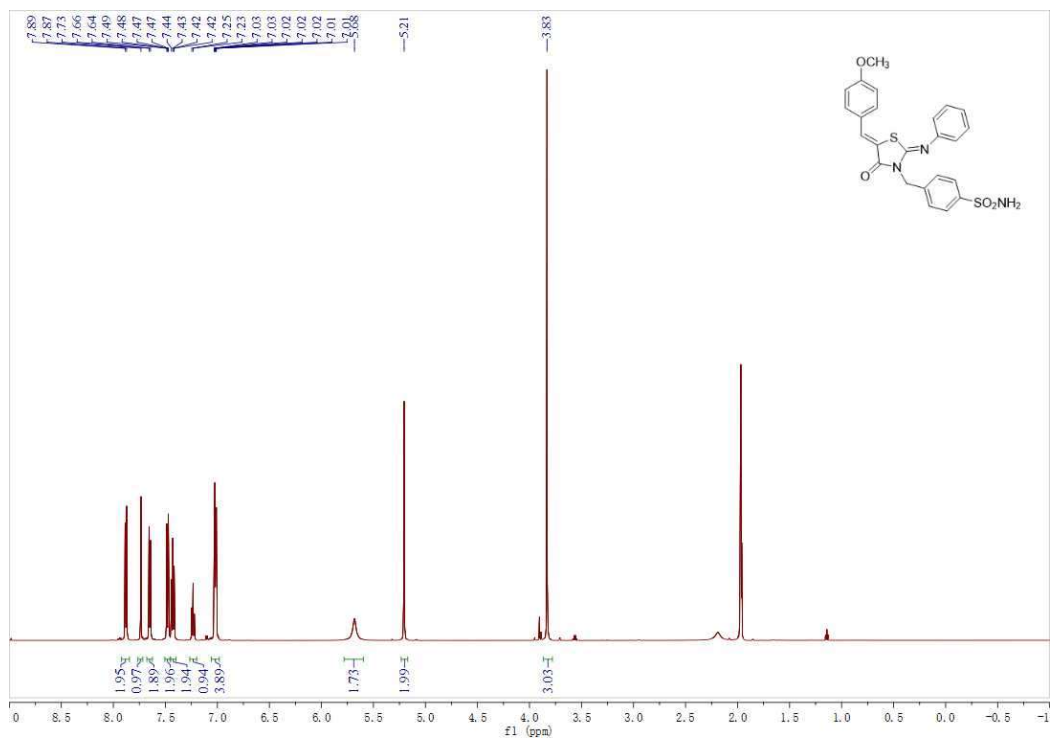

Figure S19. The <sup>1</sup>H-NMR of compound 11

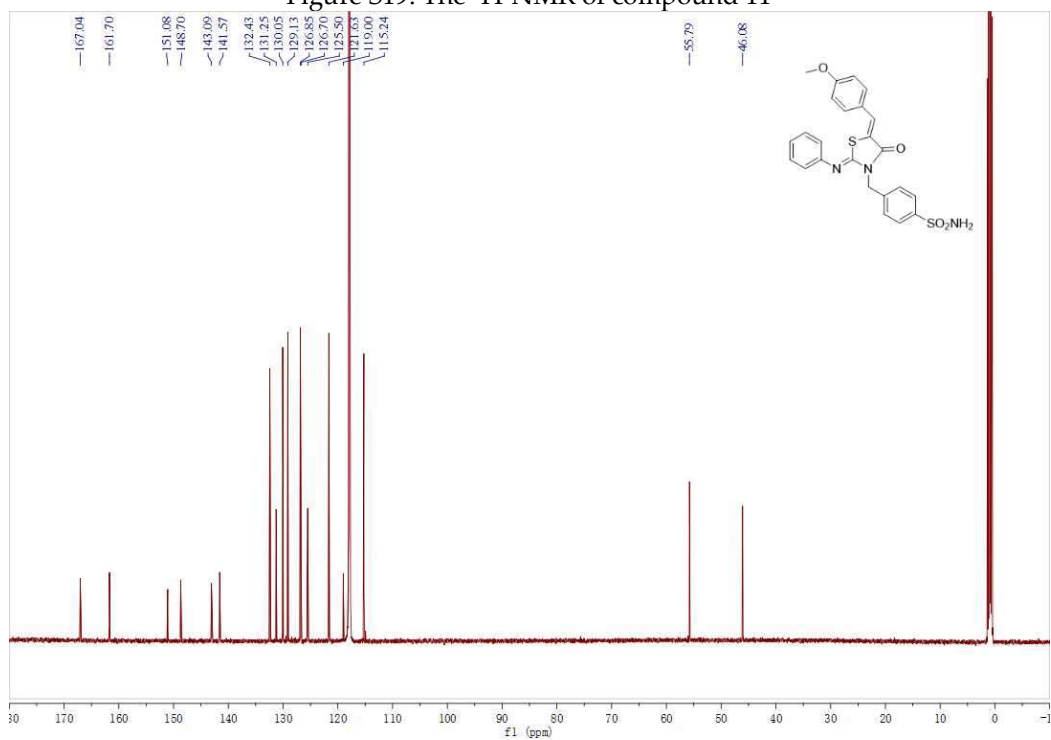

Figure S20. The <sup>13</sup>C-NMR of compound 11

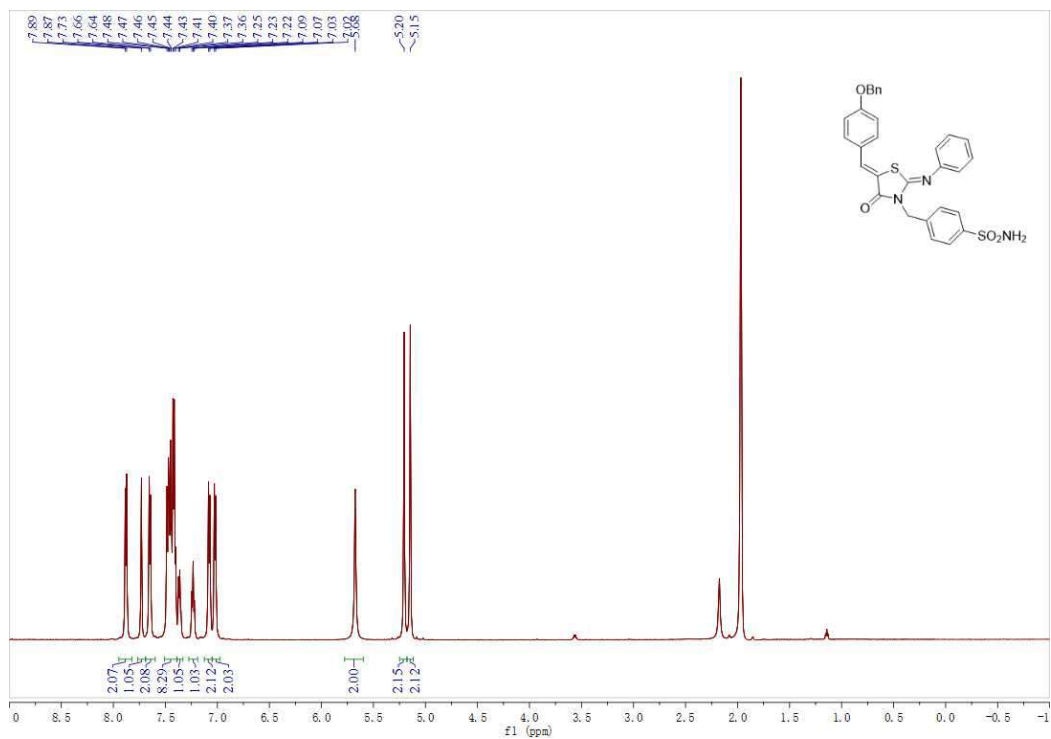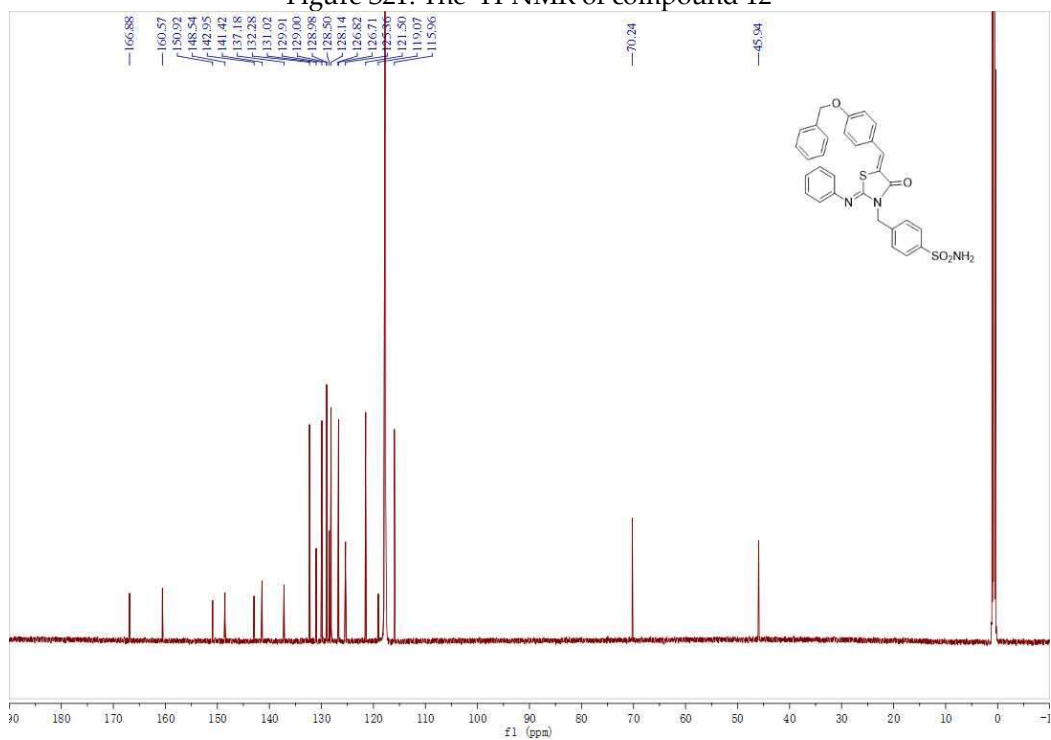

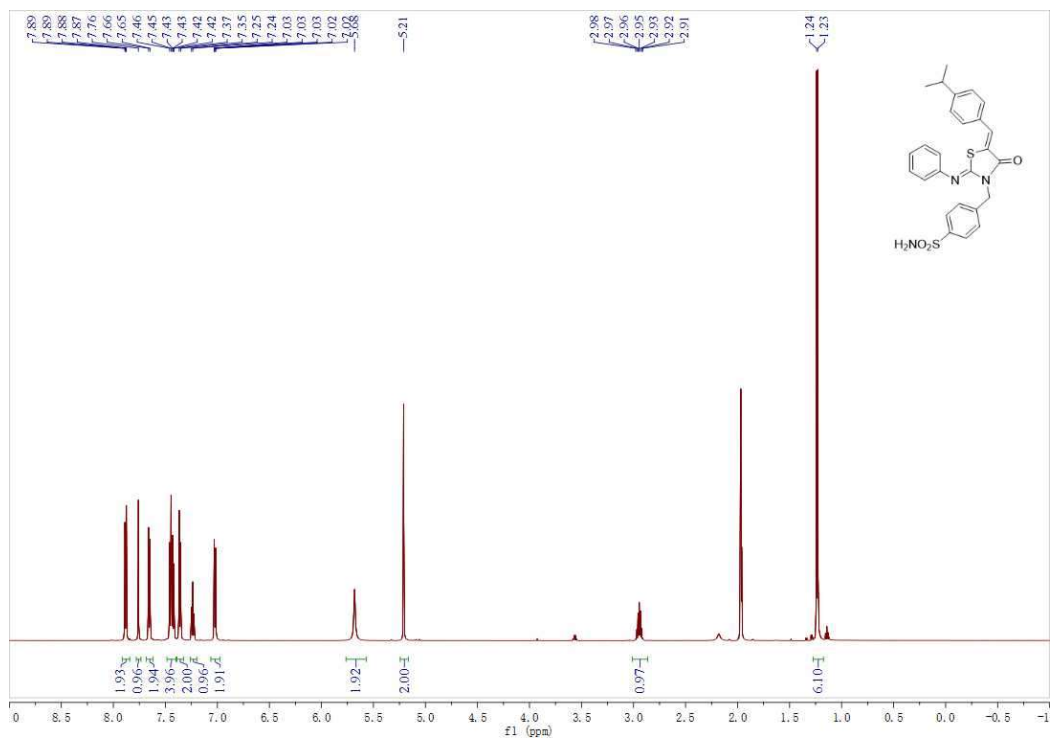

Figure S23. The  $^1\text{H}$ -NMR of compound 13

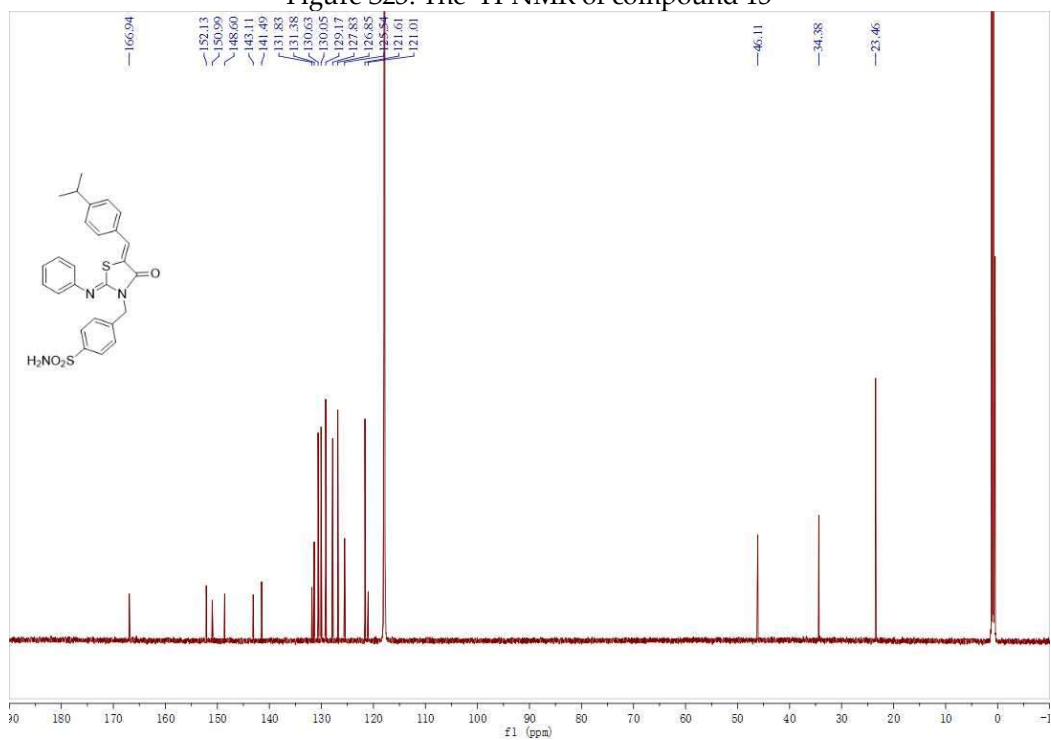

Figure S24. The  $^{13}\text{C}$ -NMR of compound 13

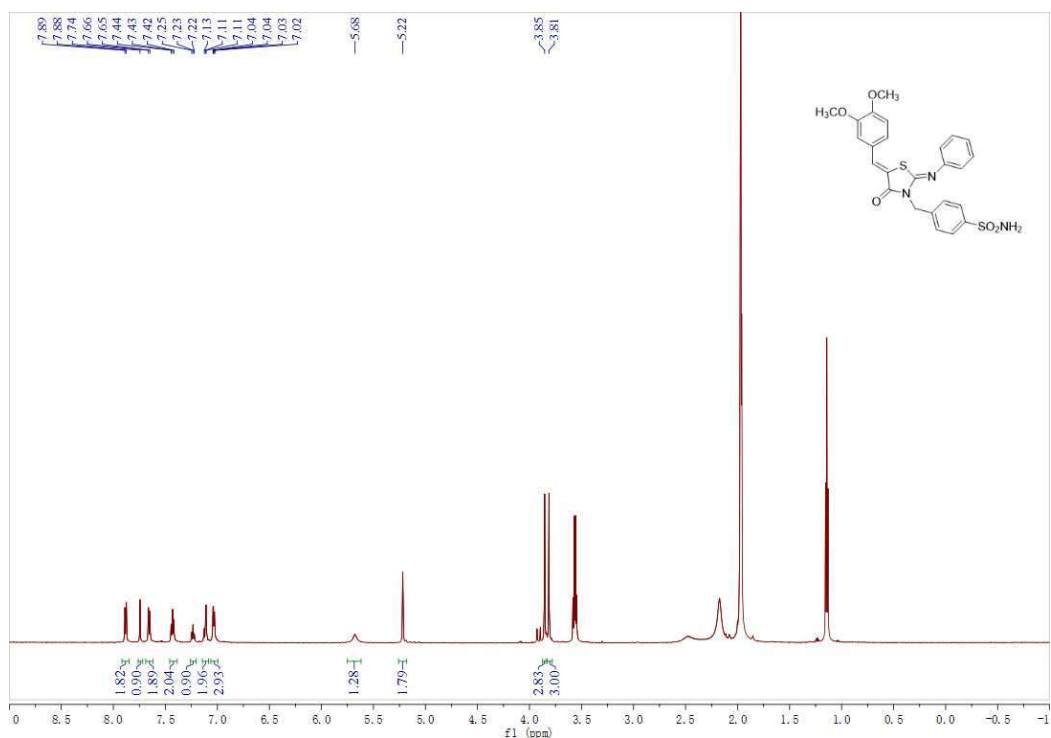

Figure S25. The  $^1\text{H}$ -NMR of compound 14

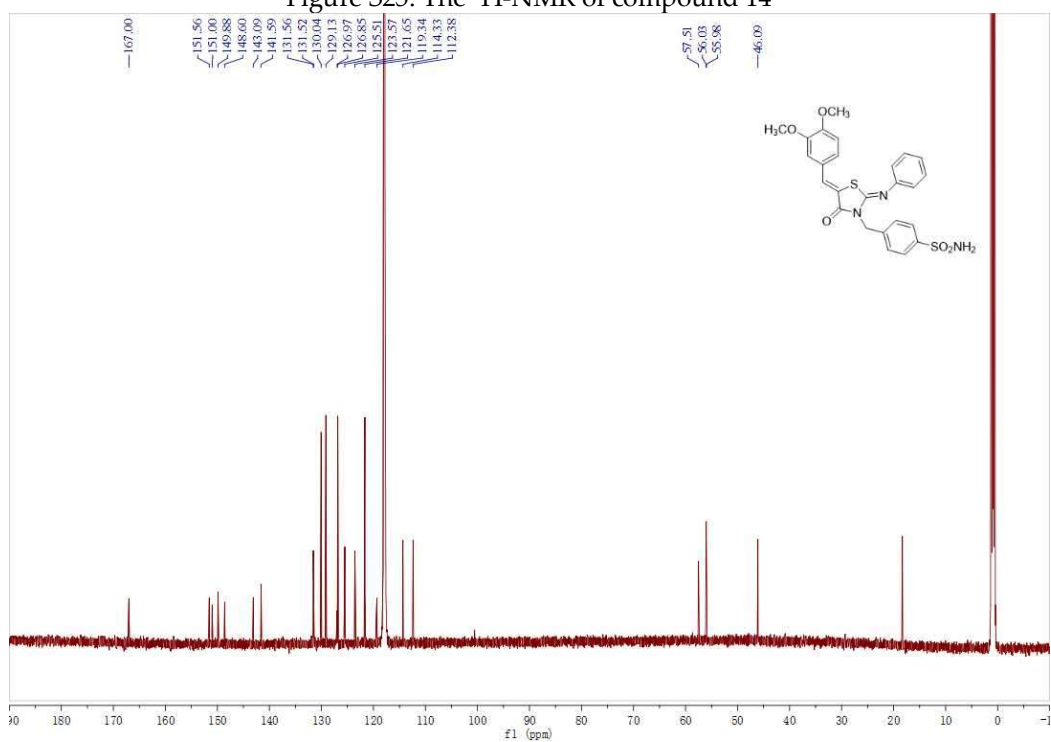

Figure S26. The  $^{13}\text{C}$ -NMR of compound 14
